# Supplementary material
Source: PubMed Central journal article supplement (PMC283582)
Supplement: pnas_100_24_14275__3.pdf [file pnas_100_24_14275__3.pdf]

**Table 3. Oligomers used for exonic amplification and sequencing**

| Gene        | PCR oligomers                 |                               | Sequencing oligomers          |
|-------------|-------------------------------|-------------------------------|-------------------------------|
|             | Forward                       | Reverse                       |                               |
| <b>MYC</b>  |                               |                               |                               |
| Exon 1      | tgttccgcctcgcgatgattatact     | gtfaccataactactctgagaaaagtgtc | tgttccgcctcgcgatgattatac      |
|             |                               |                               | gtfaccataactactctgagaaaagtgtc |
|             |                               |                               | ggcttggcgggaaaa               |
| Exon 2      | ggtagctctgcaaggggagaggttc     | caaatctctccagatctgctatctc     | ggtagctctgcaaggggagaggttc     |
|             |                               |                               | caaatctctccagatctgctatctc     |
|             |                               |                               | ggatatctggaagaaatcgagctg      |
|             |                               |                               | tgtgaccgcaacgtagg             |
| Exon 3      | gataatthttgccagagaccttcta     | aaactcttgccttcttaagaccac      | gataatthttgccagagaccttcta     |
|             |                               |                               | aaactcttgccttcttaagaccac      |
|             |                               |                               | agatcagcaacaaccgaaaatgcac     |
|             |                               |                               | ggctaaatcttfcagtctcaagactc    |
| <b>NRAS</b> |                               |                               |                               |
| Exon 1      | gggtaactttactacaattagtagtatgg | gcctttgtctccagctgatag         | gggtaactttactacaattagtagtatgg |
|             |                               |                               | gcctttgtctccagctgatag         |
| Exon 2      | gaggccgatattaatccggt          | tgaactgttctctataaacacgttaag   | gaggccgatattaatccggt          |
| Exon 3      | cagaaatggcctggaatagttagat     | tttcagtaattaccctagattctcaat   | tttcagtaattaccctagattctcaat   |
| Exon 4      | caaaactcctgggttcaagca         | cataacaacaagaatatgaatatggat   | cataacaacaagaatatgaatatggat   |
| Exon 5      | attcgtttagtaattggaatcttatgt   | tgtcatatggaaaatgtgcaga        | attcgtttagtaattggaatcttatgt   |
| Exon 6      | cattatftatgaaatgtaggcatacc    | aagacagcaacaggaatactctc       | cattatftatgaaatgtaggcatacc    |
|             |                               |                               | aagacagcaacaggaatactctc       |
| Exon 7      | gaaaagagccactttcaaggta        | aactgtgaccctgttcatt           | gaaaagagccactttcaaggta        |
|             |                               |                               | aactgtgaccctgttcatt           |
|             |                               |                               | agctaggggaaacaattacatac       |
|             |                               |                               | tttcatctgaaaagcagttcat        |
| <b>HRAS</b> |                               |                               |                               |
| Exon 1      | NA                            | NA                            | NA                            |
| Exon 2      | ctttcccatcactgggtcattaaga     | cccctcctctagaggaagcaggagac    | cccctcctctagaggaagcaggagac    |
| Exon 3      | ctagaggaggggagtcctcgtctca     | atccgagtccttaccctgttgatct     | ctagaggaggggagtcctcgtctca     |
| Exon 4      | gtctttgaggacatccaccagtaca     | agtagccccactaagactcagaacca    | gtctttgaggacatccaccagtaca     |
| Exon 5      | gtctttgaggacatccaccagtaca     | agtagccccactaagactcagaacca    | agtagccccactaagactcagaacca    |
| Exon 6      | gggcacctgttggtctgagcttag      | gtccttctctctctctctcctct       | gtccttctctctctctctcctct       |
| Exon 7      | gaagctgaaccctcctgatgagagtg    | tctgtccttatgatctgcctctgtg     | gaagctgaaccctcctgatgagagtg    |
| <b>SPI1</b> |                               |                               |                               |

| Gene         | PCR oligomers             |                               | Sequencing oligomers          |
|--------------|---------------------------|-------------------------------|-------------------------------|
|              | Forward                   | Reverse                       |                               |
| Exon 1       | ccagagacttcctgatgtagc     | acttcccactgatagcaagc          | ccagagacttcctgatgtagc         |
|              |                           |                               | acttcccactgatagcaage          |
| Exon 2       | actgagccaggggaaggtga      | attccaaagaagtctggga           | actgagccaggggaaggtga          |
|              |                           |                               | attccaaagaagtctggga           |
| Exon 3       | acgagatggtaggccccata      | ttgggtaagagcctgtgtca          | acgagatggtaggccccata          |
|              |                           |                               | ttgggtaagagcctgtgtca          |
| Exon 4       | cctgccctctgcactccttc      | acgcaccctctgcacacttg          | cctgccctctgcactccttc          |
|              |                           |                               | acgcaccctctgcacacttg          |
| Exon 5       | acacccgatggacaaatgac      | gtgagtgggtgcattgtgttt         | acacccgatggacaaatgac          |
|              |                           |                               | gtgagtgggtgcattgtgttt         |
|              |                           |                               | gacacagggaggacgc              |
|              |                           |                               | gggccctgtgcgta                |
| <b>CBFB</b>  |                           |                               |                               |
| Exon 1       | agttgtgaatggcgcttgtttg    | gtgtacttaatctgcaaggcaagac     | agttgtgaatggcgcttgtttg        |
|              |                           |                               | gtgtacttaatctgcaaggcaagac     |
| Exon 2       | ttgaatcccgagtaggaagtgagac | cgctgaaacaaggga               | ttgaatcccgagtaggaagtgagac     |
| Exon 3       | tttactttaagtattctgtgtgc   | aacatggaatgaaaacaaatctgag     | aacatggaatgaaaacaaatctgag     |
| Exon 4       | caatcagtcaatcataattttatc  | cccaaaatcaggatcagaattgag      | cccaaaatcaggatcagaattgag      |
| Exon 5       | cccggccactgttca           | aaaftaaactataaaaagcattatgcaca | aaaftaaactataaaaagcattatgcaca |
| Exon 6       | tgttacatgtgactatattggctga | tgatacctgtgatacct             | tgaagaagctccagatccc           |
|              |                           |                               | tgttacatgtgactatattggctga     |
|              |                           |                               | tgatacctgtgatacct             |
|              |                           |                               | gcatgtagccagtaataattgaagt     |
|              |                           |                               | fgctgatgtgtttgcattattac       |
|              |                           |                               | tgattactagcatttaaaggatac      |
|              |                           |                               | aaaataatgccattaatgataaaataca  |
|              |                           |                               | tgaagaagctccagatccc           |
|              |                           |                               | tgtttgtttgcccat               |
| <b>CEBPA</b> |                           |                               |                               |
| Exon 1       | ggcgcgctggaggcgggtggcgctt | cgacattgactttgatattttat       | ggcgcgctggaggcgggtggcgctt     |
|              |                           |                               | cgacattgactttgatattttat       |
|              |                           |                               | gagtcctattttggcaagtac         |
|              |                           |                               | gatacggctgataaagcaaaa         |
|              |                           |                               | ggctacctggacggcaggctgg        |
|              |                           |                               | gtagaactaggaacaacctt          |
|              |                           |                               | gacgcaccaagtccggcgca          |
|              |                           |                               | gagccccccgcacgcgcca           |
|              |                           |                               | cagctgcttgcttcate             |

| Gene        | PCR oligomers             |                           | Sequencing oligomers        |
|-------------|---------------------------|---------------------------|-----------------------------|
|             | Forward                   | Reverse                   |                             |
|             |                           |                           | ggctcgccatgccgggagaactctaa  |
| <b>RARA</b> |                           |                           |                             |
| Exon 1      | tagatccgccctgactggtgatt   | cgatctctcccaaacagggttgaat | tagatccgccctgactggtgatt     |
| Exon 2      | gaatgcctgtgtgcctgttctca   | cactcacagcagaacagacgtgcc  | cactcacagcagaacagacgtgcc    |
| Exon 3      | ggctggggagtcccagtttctta   | taaggcagggtgcctgctcctaac  | ggctggggagtcccagtttctta     |
| Exon 4      | ggcctctcccctagactgagac    | agccagactcgcaaacaggctctt  | agccagactcgcaaacaggctctt    |
| Exon 5      | gggaaagaggaggcagacaccta   | gccataccgtagtgtattgccag   | ctgccctcacagctgtgagaaac     |
| Exon 6      | ccctcttctcctcctcctgct     | gaaggacatctaccaggacacagg  | ccctcttctcctcctcctgct       |
| Exon 7      | gaggatggatgggtcagacgtag   | tgaagagctcctggaagagact    | tgaagagctcctggaagagact      |
| Exon 8      | aggtaagagtgagggttgagg     | tagtaggagctgttgagtacc     | ctaccacaaaaggtagacacag      |
| Exon 9      | gggcttaagagagctggtcgtgt   | ggctggtagaaaggcagagaaaagc | gggcttaagagagctggtcgtgt     |
| <b>AML1</b> |                           |                           |                             |
| Exon 1      | caacaggagccgagttgtactaa   | gactgaacactccaacagcataact | caacaggagccgagttgtactaa     |
|             |                           |                           | gactgaacactccaacagcataact   |
| Exon 2      | cagtaataaagcccctgaactgtg  | cgccacggcaacacagcat       | cagtaataaagcccctgaactgtg    |
| Exon 3      | aactgtgctatgtgacctactatgg | gcaataagaatgtaagacagaccg  | aactgtgctatgtgacctactatgg   |
| Exon 4      | caatctgactctatggttccg     | aataaaaggccagcatagacg     | caatctgactctatggttccg       |
|             |                           |                           | aataaaaggccagcatagacg       |
| Exon 5      | gccaacaattaatcgcc         | cccagagctcctcgtatcc       | ccccaaattcagctggcatatctt    |
|             |                           |                           | cccagagctcctcgtatcc         |
| Exon 6      | aaaactctacgttctaccgaaca   | ccattccacatgtactcccg      | aaaactctacgttctaccgaaca     |
| Exon 7      | caatcttctggcggttaa        | gagtgtgctaggagaccg        | ccatgttgaaatcataaatagggac   |
|             |                           |                           | tttggcgataggctctcacg        |
|             |                           |                           | caagaaggtccagttcttcc        |
|             |                           |                           | ttatagcattaacaatatttataatga |
|             |                           |                           | caatcttctggcggttaa          |
|             |                           |                           | gagtgtgctaggagaccg          |
|             |                           |                           | aacaaaaataaaaatcatcaggacg   |
|             |                           |                           | gcagatttctgccttgaataacc     |
|             |                           |                           | ggagagagggttctgggatatt      |
|             |                           |                           | tgcttctaagggaactgtc         |
|             |                           |                           | cctggatagtgcatgccg          |
|             |                           |                           | acatggagaactggttagga        |
|             |                           |                           | cctgacctacagcgatccc         |
|             |                           |                           | tttcaattgataagggtcg         |
|             |                           |                           | atcttctgttgccttcca          |
|             |                           |                           | gcctcctgttcgcgacaa          |
|             |                           |                           | aacaggaagattcccggag         |

| Gene        | PCR oligomers             |                             | Sequencing oligomers         |
|-------------|---------------------------|-----------------------------|------------------------------|
|             | Forward                   | Reverse                     |                              |
|             |                           |                             | cattttcttttggcttgatagtagcc   |
|             |                           |                             | aaccaagcgatcacactactca       |
|             |                           |                             | gatacctttgaattgtagccacg      |
|             |                           |                             | atagctctctctagataagaacgacct  |
| <b>KRAS</b> |                           |                             | gcagcaaaaacagctggacttat      |
| Exon 1      | atcgatagctctgccctctg      | ccctaattcattcactcgcc        | atcgatagctctgccctctg         |
|             |                           |                             | ccctaattcattcactcgcc         |
| Exon 2      | ttcatgattgaattttgtaagggt  | ggttacatataactgaaaccca      | ttcatgattgaattttgtaagggt     |
|             |                           |                             | ggttacatataactgaaaccca       |
| Exon 3      | cctgactattgatgatgttgagc   | ggatattacctacctataaacattatt | ggatattacctacctataaacattatt  |
| Exon 4      | ttgagagagatacaaggttctg    | gaaaccaaagccaaaagcag        | ttgagagagatacaaggttctg       |
|             |                           |                             | ttcccatattaatggttacatataactg |
| Exon 5      | agaacaaccaggattctagc      | acagccatcaaaaatgtctc        | acagccatcaaaaatgtctc         |
| Exon 6      | taatgtgaaaaggaaatggc      | ttgtacctgtacacatgaagc       | gcttcattaattgtttcacacc       |
|             |                           |                             | ttgtacctgtacacatgaagc        |
|             |                           |                             | aatagtttcattgccttgaat        |
|             |                           |                             | ftaaagcattattaatatggatcag    |
|             |                           |                             | cttgcaacctggctctt            |
| <b>PML</b>  |                           |                             |                              |
| Exon 1      | cattacatctacggctcttagaaa  | cctcttttctactctatctacc      | cctcttttctactctatctacc       |
|             |                           |                             | ccctacctctcccgttta           |
|             |                           |                             | gcagctctgccctacctct          |
|             |                           |                             | cattacatctacggctcttagaaa     |
| Exon 2      | aagtagatgctcaataaatggtg   | ggaaactggaaactfactatccac    | ggaaactggaaactfactatccac     |
|             |                           |                             | aagtagatgctcaataaatggtg      |
|             |                           |                             | cctgtgccggcctactca           |
|             |                           |                             | fgaatggaatatgagtcctac        |
| Exon 3      | catgtgtattgtagtttgata     | ccacagagtctgtaaatagtaaaa    | catgtgtattgtagtttgata        |
|             |                           |                             | ccacagagtctgtaaatagtaaaa     |
|             |                           |                             | fgcaggagcaggatagtcctttgg     |
|             |                           |                             | fgtccacagcatctactgcc         |
|             |                           |                             | gtagcacttcatcctctgacca       |
| Exon 4      | tagagagtcagtgagccgtagt    | ggaaggcactaatatgccatcta     | tagagagtcagtgagccgtagt       |
|             |                           |                             | ggaaggcactaatatgccatcta      |
| Exon 5      | gtgtctaagtagggctaattactga | cagattacgtctctctcagaca      | cagattacgtctctctcagaca       |
|             |                           |                             | gtgtctaagtagggctaattactga    |
|             |                           |                             | gggagaaccttaccttccatag       |
|             |                           |                             | cccagtgccagctcacttt          |

| Gene        | PCR oligomers            |                           | Sequencing oligomers      |
|-------------|--------------------------|---------------------------|---------------------------|
|             | Forward                  | Reverse                   |                           |
|             |                          |                           | gaggtgatgtgatggagagttt    |
|             |                          |                           | tgagctcggagctttgagtc      |
| Exon 6      | cttctgtctgaagagagacgta   | catagaactgtgcattttagcct   | cttctgtctgaagagagacgta    |
|             |                          |                           | catagaactgtgcattttagcct   |
| Exon 7      | attactcaaatccaaatgcaaag  | ctgagagggacagaggatcttac   | attccttaaccaagaattaatgag  |
|             |                          |                           | ctgagagggacagaggatcttac   |
|             |                          |                           | cttatgcattttctgcctctaa    |
|             |                          |                           | ggttcaacaagtgtttattgagc   |
|             |                          |                           | attactcaaatccaaatgcaaag   |
|             |                          |                           | agtctgaggttctgtattgaaa    |
| Exon 8      | acacagatttagcacttgattc   | ctctgtctgagagaagaactggt   | acacagatttagcacttgattc    |
|             |                          |                           | ctctgtctgagagaagaactggt   |
| Exon 9      | gcctgggatctctagtatagtg   | gctctcagctctgctaagtctca   | gctctcagctctgctaagtctca   |
|             |                          |                           | ctgaagccttctcagcatctac    |
|             |                          |                           | catgtctaccctcagtagcct     |
|             |                          |                           | fgtcatttggtcagaatcagtt    |
|             |                          |                           | atgcatcaaaatcactgtgaga    |
|             |                          |                           | gaacatcagttctgtctttgct    |
|             |                          |                           | gcctgggatctctagtatagtg    |
| <b>FLT3</b> |                          |                           |                           |
| Exon 2      | gtgccaggagctaggagta      | gacagccctgctctaagtatctct  | gtgccaggagctaggagta       |
|             |                          |                           | gacagccctgctctaagtatctct  |
| Exon 3      | ttaataggacctcagtcggc     | tcatgtattgatccctaactgtat  | ttaataggacctcagtcggc      |
| Exon 4      | gttaaaagtcagggftcaacga   | tataggttctacagagggttgacag | gttaaaagtcagggftcaacga    |
| Exon 5      | tcagccacagctaaatataat    | ttacccggccctataactgg      | ttacccggccctataactgg      |
| Exon 6      | ctgagctcttagetgaaccata   | tgactcctctttatgaagaaatca  | ctgagctcttagetgaaccata    |
|             |                          |                           | tgactcctctttatgaagaaatca  |
| Exon 7      | tccttcaggtcacagtaaatgc   | cgtttcttgccactgatgat      | cgtttcttgccactgatgat      |
|             |                          |                           | tccttcaggtcacagtaaatgc    |
| Exon 8      | gataaggtgcaaagctgttcat   | cgagcctggttaacgggaa       | gataaggtgcaaagctgttcat    |
| Exon 9      | gctcaggcttagaactaggata   | ctgtatcctcacatctgcttattgt | ctgtatcctcacatctgcttattgt |
|             |                          |                           | gctcaggcttagaactaggata    |
| Exon 10     | cctgtctgtggaccacacttt    | tgaagctacagggatctatgattg  | cctgtctgtggaccacacttt     |
|             |                          |                           | tgaagctacagggatctatgattg  |
| Exon 11     | attccagaaagtaccatactcca  | cagcgagttctaaaagagattcat  | cagcgagttctaaaagagattcat  |
|             |                          |                           | attccagaaagtaccatactcca   |
| Exon 12     | aatgtaaccttctcaatcaacc   | tcccgtcactgtgacacat       | aatgtaaccttctcaatcaacc    |
| Exon 13     | gcaattttctaggaggaaatgtat | ggaaactcccatttgagatcatatt | ggaaactcccatttgagatcatatt |

| Gene         | PCR oligomers              |                            | Sequencing oligomers       |
|--------------|----------------------------|----------------------------|----------------------------|
|              | Forward                    | Reverse                    |                            |
| Exon 14      | tctgcagaactgcctattcc       | ccaaaagcacctgatcctag       | ccaaaagcacctgatcctag       |
|              |                            |                            | tctgcagaactgcctattcc       |
| Exon 15      | fcccagagagaacttag          | cgttaacacctcagtgctta       | fcccagagagaacttag          |
| Exon 16      | catgcctggcttctctcata       | ttgacctctgatttatagagtg     | ttgacctctgatttatagagtg     |
|              |                            |                            | catgcctggcttctctcata       |
| Exon 17      | gagcaaaagctgaaactgaattta   | caacagggaaactatagcaaagat   | caacagggaaactatagcaaagat   |
| Exon 18      | gggtgtggcaaggattgagt       | acaaactggcttttagctatcatc   | acaaactggcttttagctatcatc   |
| Exon 19      | gaccttcataggcagcataa       | ccaggcctttatgctactacaat    | ccaggcctttatgctactacaat    |
|              |                            |                            | gaccttcataggcagcataa       |
| Exon 20      | gataagaggccttccatcac       | agtaagcagactgctgtgag       | agtaagcagactgctgtgag       |
|              |                            |                            | gataagaggccttccatcac       |
| Exon 21      | fgttcgagaggagtgtaagaaat    | gctctcaagcaggttatagacca    | gctctcaagcaggttatagacca    |
| Exon 22      | gataagaggccttccatcac       | agtaagcagactgctgtgag       | agtaagcagactgctgtgag       |
|              |                            |                            | gataagaggccttccatcac       |
| Exon 23      | tctgatttctccttcggatag      | gcaatgagaatgacaacttgga     | tctgatttctccttcggatag      |
| Exon 24      | gctcaaaccagaacatcaa        | tggtatgggtgcacaattt        | gctcaaaccagaacatcaa        |
| <b>c-KIT</b> |                            |                            |                            |
| Exon 1       | fgcatgtccacactgcga         | cacaaatgggctaaacctactg     | cacaaatgggctaaacctactg     |
|              |                            |                            | fgcatgtccacactgcga         |
| Exon 2       | gtccaagcttagtgcgtgata      | tctatggcagatacattcacctctat | gtccaagcttagtgcgtgata      |
| Exon 3       | cactcaatttactgaaggatgct    | agcatgaagtaataacatgaatctga | agcatgaagtaataacatgaatctga |
|              |                            |                            | cactcaatttactgaaggatgct    |
| Exon 4       | tcctgtaatatgaaggttccaatg   | gctttccacttctcactaa        | gctttccacttctcactaa        |
|              |                            |                            | tcctgtaatatgaaggttccaatg   |
| Exon 5       | cctttcactgtgacagtgat       | agagactgctgtatcccag        | agagactgctgtatcccag        |
| Exon 6       | tcacaacaggcgttggtc         | ttcaactgtttggctcctct       | tcacaacaggcgttggtc         |
| Exon 7       | agccgctcctgtacct           | gcaacaaaaatfatgtctaccaag   | agccgctcctgtacct           |
| Exon 8       | tcatcaggattcaaacccg        | gcatggttaaaattgctctgga     | gcatggttaaaattgctctgga     |
| Exon 9       | ctcaacttctattctgcagtattgtg | gaaaactcattgtttcaggtgg     | ctcaacttctattctgcagtattgtg |
| Exon 10      | gggtcagttgggactgag         | gtccagagacatttctacga       | gtccagagacatttctacga       |
| Exon 11      | fgttcacctgaacaatgagt       | caataaaaggcagcttgaca       | caataaaaggcagcttgaca       |
| Exon 12      | cctgtgtcttcttctctacag      | aatacgacaataactagggtatgtcc | aatacgacaataactagggtatgtcc |
|              |                            |                            | cctgtgtcttcttctctacag      |
| Exon 13      | gctgtttatgttactccacataagg  | tgcatggaactaaagttagaaga    | tgcatggaactaaagttagaaga    |
|              |                            |                            | gctgtttatgttactccacataagg  |
| Exon 14      | gcatggacccaatatcg          | ccatatctatagaagatactcaggca | ccatatctatagaagatactcaggca |
|              |                            |                            | gcatggacccaatatcg          |
| Exon 15      | tgtaaccagcctaggattgt       | agacaggctgtactttacagcttat  | tgtaaccagcctaggattgt       |

| Gene    | PCR oligomers                |                            | Sequencing oligomers         |
|---------|------------------------------|----------------------------|------------------------------|
|         | Forward                      | Reverse                    |                              |
| Exon 16 | gtgaacatcattcaaggcgt         | gaatgtagttgtagtaatgttcagca | gaatgtagttgtagtaatgttcagca   |
|         |                              |                            | gtgaacatcattcaaggcgt         |
| Exon 17 | ftaatctccatgccgtactga        | aaataaaaggaaaacgtgacc      | aaataaaaggaaaacgtgacc        |
|         |                              |                            | ftaatctccatgccgtactga        |
| Exon 18 | tctgttcaattttgtgagcttct      | cagggtatgcaactggac         | cagggtatgcaactggac           |
| Exon 19 | ctgtagttattttcataatctctgtcac | gtgagtacaaaactctccacct     | gtgagtacaaaactctccacct       |
|         |                              |                            | ctgtagttattttcataatctctgtcac |
| Exon 20 | ggtaagatagtcttgggcct         | aatatctgttgaatctcgaagca    | aatatctgttgaatctcgaagca      |
|         |                              |                            | catttagagaactgtggccgt        |
|         |                              |                            | gcttaatgttgaaatttttgg        |
|         |                              |                            | ttttcacatagctgtctagagtagctt  |
|         |                              |                            | gattaagagccatataagtttgaagg   |
|         |                              |                            | cttgtgcacgacgatgtct          |
|         |                              |                            | gattagaagctgaaaacctaatgccc   |
|         |                              |                            | ggtaagatagtcttgggcct         |

NA, not applicable.
